# Supplementary material
Source: PubMed Central journal article supplement (PMC6238364)
Supplement: dey309suppl_table1.pdf [file dey309suppl_table1.pdf]

**Supplementary Table S1** Model building for inverse probability weights.

| Model                                                                                                                                                                                                                    | Weight mean $\pm$<br>standard deviation | Weight<br>minimum/<br>maximum | C-<br>statistic <sup>a</sup> |
|--------------------------------------------------------------------------------------------------------------------------------------------------------------------------------------------------------------------------|-----------------------------------------|-------------------------------|------------------------------|
| Parity, infertility diagnosis, age                                                                                                                                                                                       |                                         |                               |                              |
| Unstabilized                                                                                                                                                                                                             | 1.84 $\pm$ 1.10                         | 1.05/23.1                     | 0.62                         |
| Stabilized <sup>b</sup>                                                                                                                                                                                                  | 1.02 $\pm$ 0.22                         | 0.31/5.9                      |                              |
| Parity, infertility diagnosis, age, number of mature oocytes                                                                                                                                                             |                                         |                               |                              |
| Unstabilized                                                                                                                                                                                                             | 1.73 $\pm$ 1.05                         | 1.00/22.1                     | 0.64                         |
| Stabilized <sup>b</sup>                                                                                                                                                                                                  | 0.97 $\pm$ 0.25                         | 0.25/5.59                     |                              |
| Parity, infertility diagnosis, age, prior canceled cycle                                                                                                                                                                 |                                         |                               |                              |
| Unstabilized                                                                                                                                                                                                             | 1.88 $\pm$ 1.21                         | 1.05/26.4                     | 0.64                         |
| Stabilized <sup>b</sup>                                                                                                                                                                                                  | 1.04 $\pm$ 0.29                         | 0.31/9.86                     |                              |
| Parity at baseline, age, insurance                                                                                                                                                                                       |                                         |                               |                              |
| Unstabilized                                                                                                                                                                                                             | 1.86 $\pm$ 1.37                         | 1.05/80.0                     | 0.63                         |
| Stabilized <sup>b</sup>                                                                                                                                                                                                  | 1.02 $\pm$ 0.32                         | 0.31/15.1                     |                              |
| Parity at baseline, age, fresh vs frozen cycle                                                                                                                                                                           |                                         |                               |                              |
| Unstabilized                                                                                                                                                                                                             | 1.85 $\pm$ 1.17                         | 1.05/40.5                     | 0.63                         |
| Stabilized <sup>b</sup>                                                                                                                                                                                                  | 1.02 $\pm$ 0.23                         | 0.32/8.15                     |                              |
| Parity at baseline, age, cycle year                                                                                                                                                                                      |                                         |                               |                              |
| Unstabilized                                                                                                                                                                                                             | 1.84 $\pm$ 1.10                         | 1.05/23.3                     | 0.62                         |
| Stabilized <sup>b</sup>                                                                                                                                                                                                  | 1.02 $\pm$ 0.22                         | 0.32/6.00                     |                              |
| Parity at baseline, age, gravidity                                                                                                                                                                                       |                                         |                               |                              |
| Unstabilized                                                                                                                                                                                                             | 1.86 $\pm$ 1.19                         | 1.05/34.2                     | 0.63                         |
| Stabilized <sup>b</sup>                                                                                                                                                                                                  | 1.03 $\pm$ 0.25                         | 0.33/9.36                     |                              |
| Parity at baseline, age, prior outcome loss                                                                                                                                                                              |                                         |                               |                              |
| Unstabilized                                                                                                                                                                                                             | 1.85 $\pm$ 1.10                         | 1.05/24.5                     | 0.62                         |
| Stabilized <sup>b</sup>                                                                                                                                                                                                  | 1.02 $\pm$ 0.22                         | 0.32/6.69                     |                              |
| Parity at baseline, age, number of embryos transferred                                                                                                                                                                   |                                         |                               |                              |
| Unstabilized                                                                                                                                                                                                             | 1.86 $\pm$ 1.16                         | 1.05/31.5                     | 0.63                         |
| Stabilized <sup>b</sup>                                                                                                                                                                                                  | 1.04 $\pm$ 0.26                         | 0.32/7.91                     |                              |
| Full model: parity at baseline, age, number of mature oocytes, prior canceled cycle, insurance, fresh vs. frozen cycles, gravidity, prior outcome loss, infertility diagnosis, cycle year, number of embryos transferred |                                         |                               |                              |
| Unstabilized                                                                                                                                                                                                             | 1.83 $\pm$ 2.96                         | 1.00/322.9                    | 0.68                         |
| Stabilized <sup>b</sup>                                                                                                                                                                                                  | 1.00 $\pm$ 0.81                         | 0.25/91.3                     |                              |

<sup>a</sup>C-statistic calculated from the pooled logistic denominator model.<sup>b</sup>Stabilized models include a numerator adjusting for parity at baseline.
